# Supplementary material for: Designing a novel perovskite-type KCd(NH2SO3)3 with deep-ultraviolet transparency and strong second-harmonic generation response
Source: Royal Society of Chemistry journal article supplement (doi:10.1039/d4qi03043e), 2025-01-01
Supplement: d4qi03043e1.pdf [file d4qi03043e1.pdf]

## Electronic Supplementary Information (ESI)

# Designing a Novel Perovskite-Type $\text{KCd}(\text{NH}_2\text{SO}_3)_3$ with Deep-Ultraviolet Transparency and Strong Second-harmonic Generation Response

Yujie Fan,<sup>a,b</sup> Li Zhong<sup>a,b</sup>, Haotian Tian,<sup>b</sup> Chensheng Lin,<sup>b</sup> Lingli Wu,<sup>b</sup> Tao Yan,<sup>\*b</sup> Min Luo<sup>\*b</sup>

a College of Chemistry, Fuzhou University, Fuzhou, Fujian 350108, China.

b Key Laboratory of Optoelectronic Materials Chemistry and Physics, Fujian Institute of Research on the Structure of Matter, Chinese Academy of Sciences, Fuzhou, Fujian, 350002, China.  
E-mail: lm8901@fjirsm.ac.cn.

## Contents

|                                                                                                                                                                                                                                                          |    |
|----------------------------------------------------------------------------------------------------------------------------------------------------------------------------------------------------------------------------------------------------------|----|
| Table S1. Crystal Data and Structure Refinement of $\text{KCd}(\text{NH}_2\text{SO}_3)_3$ .....                                                                                                                                                          | 3  |
| Table S2. Atomic coordinates ( $\times 10^4$ ), equivalent isotropic displacement parameters ( $\text{\AA}^2 \times 10^3$ ) for $\text{KCd}(\text{NH}_2\text{SO}_3)_3$ . .....                                                                           | 4  |
| Table S3. Bond lengths [Å] and angles [deg] for $\text{KCd}(\text{NH}_2\text{SO}_3)_3$ . .....                                                                                                                                                           | 5  |
| Table S4. Anisotropic displacement parameters ( $\text{\AA}^2 \times 10^3$ ) for $\text{KCd}(\text{NH}_2\text{SO}_3)_3$ . The anisotropic displacement factor exponent takes the form: $-2\pi^2 [h^2 a^{*2} U_{11} + 2hka^* b^* U_{12} + \dots]$ . ..... | 7  |
| Table S5. The degree of distortion, dipole moment, and hyperpolarizability of the $[\text{CdN}_3\text{O}_3]$ octahedral unit with different N-Cd-O bond angles. ....                                                                                     | 8  |
| Table S6. Cd-based UV/DUV NLO Crystal ( $\lambda_{\text{cut-off}} < 300\text{nm}$ ). ....                                                                                                                                                                | 9  |
| Figure S1. Photograph of $\text{KCd}(\text{NH}_2\text{SO}_3)_3$ crystal. ....                                                                                                                                                                            | 10 |
| Figure S2. The rocking curve of $\text{KCd}(\text{NH}_2\text{SO}_3)_3$ single crystal. ....                                                                                                                                                              | 11 |
| Figure S3. Calculated and experimental powder X-ray diffraction patterns of $\text{KCd}(\text{NH}_2\text{SO}_3)_3$ . No obvious impurity peaks were found, confirming the phase purity. ....                                                             | 12 |
| Figure S4. Energy dispersive X-ray spectroscopy analysis of $\text{KCd}(\text{NH}_2\text{SO}_3)_3$ . ....                                                                                                                                                | 13 |
| Figure S5. TG-DSC curves of $\text{KCd}(\text{NH}_2\text{SO}_3)_3$ . ....                                                                                                                                                                                | 14 |
| Figure S6. The calculated band structure of $\text{KCd}(\text{NH}_2\text{SO}_3)_3$ . ....                                                                                                                                                                | 15 |
| Figure S7. The SHG density of $d_{33}$ in occupied state and unoccupied state for $\text{KCd}(\text{NH}_2\text{SO}_3)_3$ . ....                                                                                                                          | 16 |
| Figure S8. $\text{KCd}(\text{NH}_2\text{SO}_3)_3$ the $[\text{CdN}_3\text{O}_3]$ octahedral unit with different N-Cd-O bond angles and lengths of the octahedron. ....                                                                                   | 17 |
| References .....                                                                                                                                                                                                                                         | 18 |

**Table S1.** Crystal Data and Structure Refinement of  $\text{KCd}(\text{NH}_2\text{SO}_3)_3$ 

| Formula                                                              | $\text{KCd}(\text{NH}_2\text{SO}_3)_3$      |
|----------------------------------------------------------------------|---------------------------------------------|
| Formula weight                                                       | 204.07                                      |
| Temperature (K)                                                      | 293(2)                                      |
| Wavelength (Å)                                                       | 0.71073                                     |
| Crystal system                                                       | Hexagonal                                   |
| space group                                                          | $P6_3$                                      |
| a (Å)                                                                | 8.559(4)                                    |
| b (Å)                                                                | 8.559(4)                                    |
| c (Å)                                                                | 7.949(4)                                    |
| $\alpha$ (deg.)                                                      | 90                                          |
| $\beta$ (deg.)                                                       | 90                                          |
| $\gamma$ (deg.)                                                      | 120                                         |
| V (Å <sup>3</sup> )                                                  | 504.3(5)                                    |
| Z                                                                    | 4                                           |
| Calculated density (mg/m <sup>3</sup> )                              | 2.688                                       |
| Absorption coefficient (mm <sup>-1</sup> )                           | 5.394                                       |
| F(000)                                                               | 375                                         |
| Theta range (deg.)                                                   | 2.748 to 27.483                             |
| Limiting indices                                                     | -11 ≤ h ≤ 11<br>-11 ≤ k ≤ 11<br>-10 ≤ l ≤ 8 |
| Reflections collected / unique                                       | 3022 / 253                                  |
| R(int)                                                               | 0.0432                                      |
| Completeness to $\theta = 25.242$ (%)                                | 100.0                                       |
| Goodness-of-fit on F <sup>2</sup>                                    | 1.052                                       |
| R/wR (I > 2σ(I))                                                     | R1 = 0.0168<br>wR2 = 0.0389                 |
| R/wR (all data)                                                      | R1 = 0.0174,<br>wR2 = 0.0390                |
| Absolute structure parameter                                         | 0.03(3)                                     |
| $^a R_1 = \sum   F_o  -  F_c   / \sum  F_o $                         |                                             |
| $^b wR_2(F_o^2) = [\sum w(F_o^2 - F_c^2)^2 / \sum w(F_o^2)^2]^{1/2}$ |                                             |

**Table S2.** Atomic coordinates ( $\times 10^4$ ), equivalent isotropic displacement parameters ( $\text{\AA}^2 \times 10^3$ ) for  $\text{KCd}(\text{NH}_2\text{SO}_3)_3$ .

| Atom   | x       | y       | z       | U(eq) | BVS   |
|--------|---------|---------|---------|-------|-------|
| Cd(01) | 6667    | 3333    | 7380(1) | 13(1) | 2.023 |
| S(002) | 3645(1) | 3124(1) | 4140(1) | 14(1) | 5.938 |
| K(003) | 0       | 0       | 6686(2) | 24(1) | 1.091 |
| O(004) | 1747(4) | 2533(4) | 4200(5) | 22(1) | 1.925 |
| O(005) | 4236(4) | 2596(4) | 5650(4) | 25(1) | 1.933 |
| O(006) | 4211(4) | 2653(5) | 2607(5) | 31(1) | 1.731 |
| N(007) | 4665(5) | 5393(4) | 4111(5) | 21(1) | 4.217 |

**Table S3.** Bond lengths [Å] and angles [deg] for  $\text{KCd}(\text{NH}_2\text{SO}_3)_3$ .

|                          |            |                           |            |
|--------------------------|------------|---------------------------|------------|
| Cd(01)-O(005)#1          | 2.303(3)   | O(005)#2-Cd(01)-N(007)#3  | 84.05(14)  |
| Cd(01)-O(005)#2          | 2.303(3)   | O(005)-Cd(01)-N(007)#3    | 169.00(12) |
| Cd(01)-O(005)            | 2.303(3)   | O(005)-Cd(01)-N(007)#5    | 99.27(11)  |
| Cd(01)-N(007)#3          | 2.371(4)   | N(007)#3-Cd(01)-N(007)#4  | 89.73(15)  |
| Cd(01)-N(007)#4          | 2.371(4)   | N(007)#3-Cd(01)-N(007)#5  | 89.73(15)  |
| Cd(01)-N(007)#5          | 2.371(4)   | N(007)#5-Cd(01)-N(007)#4  | 89.73(15)  |
| S(002)-K(003)            | 3.5548(19) | K(003)#6-S(002)-K(003)    | 68.42(4)   |
| S(002)-K(003)#6          | 3.5135(19) | O(004)-S(002)-K(003)      | 46.00(13)  |
| S(002)-O(004)            | 1.440(3)   | O(004)-S(002)-K(003)#6    | 48.30(15)  |
| S(002)-O(005)            | 1.459(3)   | O(004)-S(002)-O(005)      | 111.6(2)   |
| S(002)-O(006)            | 1.441(4)   | O(004)-S(002)-O(006)      | 114.0(2)   |
| S(002)-N(007)            | 1.684(3)   | O(004)-S(002)-N(007)      | 104.44(16) |
| K(003)-O(004)#5          | 2.773(4)   | O(005)-S(002)-K(003)      | 66.97(13)  |
| K(003)-O(004)#7          | 2.773(4)   | O(005)-S(002)-K(003)#6    | 122.30(13) |
| K(003)-O(004)#8          | 2.773(4)   | O(005)-S(002)-N(007)      | 107.95(18) |
| K(003)-O(004)#9          | 2.757(4)   | O(006)-S(002)-K(003)#6    | 67.20(15)  |
| K(003)-O(004)            | 2.757(4)   | O(006)-S(002)-K(003)      | 124.20(16) |
| K(003)-O(004)#10         | 2.757(4)   | O(006)-S(002)-O(005)      | 113.03(19) |
| K(003)-O(005)#10         | 3.272(3)   | O(006)-S(002)-N(007)      | 104.9(2)   |
| K(003)-O(005)            | 3.272(3)   | N(007)-S(002)-K(003)#6    | 128.38(14) |
| K(003)-O(005)#9          | 3.272(3)   | N(007)-S(002)-K(003)      | 129.00(15) |
| K(003)-O(006)#8          | 3.240(4)   | O(004)#10-K(003)-O(004)#7 | 105.96(7)  |
| K(003)-O(006)#5          | 3.240(4)   | O(004)-K(003)-O(004)#8    | 105.96(7)  |
| K(003)-O(006)#7          | 3.240(4)   | O(004)#5-K(003)-O(004)#7  | 73.79(11)  |
| N(007)-H(00A)            | 0.89       | O(004)#10-K(003)-O(004)   | 74.29(12)  |
| N(007)-H(00B)            | 0.89       | O(004)-K(003)-O(004)#5    | 105.96(7)  |
| O(005)#1-Cd(01)-O(005)#2 | 88.00(12)  | O(004)#9-K(003)-O(004)    | 74.29(12)  |
| O(005)#1-Cd(01)-O(005)   | 88.00(12)  | O(004)#9-K(003)-O(004)#8  | 179.68(12) |
| O(005)#2-Cd(01)-O(005)   | 88.00(12)  | O(004)#10-K(003)-O(004)#5 | 179.68(12) |
| O(005)#1-Cd(01)-N(007)#5 | 84.05(13)  | O(004)#8-K(003)-O(004)#7  | 73.79(11)  |
| O(005)-Cd(01)-N(007)#4   | 84.05(13)  | O(004)#9-K(003)-O(004)#7  | 105.96(7)  |
| O(005)#1-Cd(01)-N(007)#4 | 169.00(12) | O(004)-K(003)-O(004)#7    | 179.68(12) |
| O(005)#2-Cd(01)-N(007)#5 | 169.00(12) | O(004)#9-K(003)-O(004)#5  | 105.96(7)  |
| O(005)#1-Cd(01)-N(007)#3 | 99.27(11)  | O(004)#10-K(003)-O(004)#8 | 105.96(7)  |
| O(005)#2-Cd(01)-N(007)#4 | 99.27(11)  | O(004)#10-K(003)-O(004)#9 | 74.29(12)  |
| O(004)#7-K(003)-O(005)   | 133.93(9)  | O(004)#7-K(003)-O(006)#5  | 74.37(10)  |

|                            |            |                           |            |
|----------------------------|------------|---------------------------|------------|
| O(004)#8-K(003)-O(005)     | 107.48(9)  | O(004)-K(003)-O(006)#7    | 133.56(10) |
| O(004)#10-K(003)-O(005)    | 117.03(11) | O(004)#8-K(003)-O(006)#7  | 74.37(10)  |
| O(004)#9-K(003)-O(005)#9   | 45.91(8)   | O(004)#5-K(003)-O(006)#7  | 117.90(11) |
| O(004)#8-K(003)-O(005)#10  | 63.27(9)   | O(005)#9-K(003)-O(005)#10 | 113.89(5)  |
| O(004)-K(003)-O(005)#9     | 117.03(11) | O(005)#10-K(003)-O(005)   | 113.89(5)  |
| O(004)-K(003)-O(005)       | 45.91(8)   | O(005)#9-K(003)-O(005)    | 113.89(5)  |
| O(004)#5-K(003)-O(005)#9   | 107.48(8)  | O(006)#8-K(003)-O(005)#10 | 64.51(9)   |
| O(004)#5-K(003)-O(005)#10  | 133.93(9)  | O(006)#5-K(003)-O(005)    | 64.51(9)   |
| O(004)#8-K(003)-O(005)#9   | 133.93(9)  | O(006)#7-K(003)-O(005)#10 | 66.52(9)   |
| O(004)#7-K(003)-O(005)#10  | 107.48(9)  | O(006)#5-K(003)-O(005)#9  | 66.52(9)   |
| O(004)#7-K(003)-O(005)#9   | 63.27(9)   | O(006)#7-K(003)-O(005)#9  | 64.51(9)   |
| O(004)#9-K(003)-O(005)     | 72.54(9)   | O(006)#8-K(003)-O(005)#9  | 178.13(11) |
| O(004)#10-K(003)-O(005)#10 | 45.91(8)   | O(006)#5-K(003)-O(005)#10 | 178.13(11) |
| O(004)#5-K(003)-O(005)     | 63.27(9)   | O(006)#7-K(003)-O(005)    | 178.13(11) |
| O(004)#9-K(003)-O(005)#10  | 117.03(11) | O(006)#8-K(003)-O(005)    | 66.52(9)   |
| O(004)-K(003)-O(005)#10    | 72.54(9)   | O(006)#8-K(003)-O(006)#5  | 115.05(5)  |
| O(004)#10-K(003)-O(005)#9  | 72.54(9)   | O(006)#7-K(003)-O(006)#5  | 115.05(5)  |
| O(004)#9-K(003)-O(006)#8   | 133.56(10) | O(006)#8-K(003)-O(006)#7  | 115.05(5)  |
| O(004)#10-K(003)-O(006)#8  | 105.62(10) | S(002)-O(004)-K(003)#6    | 108.88(18) |
| O(004)-K(003)-O(006)#5     | 105.62(10) | S(002)-O(004)-K(003)      | 111.92(17) |
| O(004)-K(003)-O(006)#8     | 61.80(10)  | K(003)-O(004)-K(003)#6    | 91.91(10)  |
| O(004)#10-K(003)-O(006)#5  | 133.56(10) | Cd(01)-O(005)-K(003)      | 125.32(13) |
| O(004)#5-K(003)-O(006)#8   | 74.37(10)  | S(002)-O(005)-Cd(01)      | 144.29(19) |
| O(004)#8-K(003)-O(006)#5   | 117.90(11) | S(002)-O(005)-K(003)      | 88.80(14)  |
| O(004)#8-K(003)-O(006)#8   | 46.61(9)   | S(002)-O(006)-K(003)#6    | 88.59(15)  |
| O(004)#7-K(003)-O(006)#7   | 46.61(9)   | Cd(01)#11-N(007)-H(00A)   | 108.2      |
| O(004)#7-K(003)-O(006)#8   | 117.90(11) | Cd(01)#11-N(007)-H(00B)   | 108.2      |
| O(004)#9-K(003)-O(006)#5   | 61.80(10)  | S(002)-N(007)-Cd(01)#11   | 116.54(18) |
| O(004)#10-K(003)-O(006)#7  | 61.80(10)  | S(002)-N(007)-H(00A)      | 108.2      |
| O(004)#5-K(003)-O(006)#5   | 46.61(9)   | S(002)-N(007)-H(00B)      | 108.2      |
| O(004)#9-K(003)-O(006)#7   | 105.62(10) | H(00A)-N(007)-H(00B)      | 107.3      |

Symmetry transformations used to generate equivalent atoms:

#1 -y+1,x-y,z #2 -x+y+1,-x+1,z #3 x-y+1,x,z+1/2 #4 -x+1,-y+1,z+1/2 #5 y,-x+y,z+1/2

#6 -x,-y,z-1/2 #7 -x,-y,z+1/2 #8 x-y,x,z+1/2 #9 -x+y,-x,z #10 -y,x-y,z #11 -x+1,-y+1,z-1/2

**Table S4.** Anisotropic displacement parameters ( $\text{\AA}^2 \times 10^3$ ) for  $\text{KCd}(\text{NH}_2\text{SO}_3)_3$ . The anisotropic displacement factor exponent takes the form:  $-2\pi^2 [h^2 a^2 U_{11} + 2hka^* b^* U_{12} + \dots]$ .

| Atom   | $U_{11}$ | $U_{22}$ | $U_{33}$ | $U_{23}$ | $U_{13}$ | $U_{12}$ |
|--------|----------|----------|----------|----------|----------|----------|
| Cd(01) | 15(1)    | 15(1)    | 15(1)    | 0        | 0        | 7(1)     |
| S(002) | 16(1)    | 13(1)    | 16(1)    | -1(1)    | -3(1)    | 7(1)     |
| K(003) | 28(1)    | 28(1)    | 15(1)    | 0        | 0        | 14(1)    |
| O(004) | 13(1)    | 20(2)    | 32(2)    | 2(2)     | -2(2)    | 6(1)     |
| O(005) | 26(2)    | 22(2)    | 26(2)    | 6(2)     | -11(2)   | 11(2)    |
| O(006) | 39(2)    | 36(2)    | 24(2)    | -4(2)    | 5(2)     | 24(2)    |
| N(007) | 22(2)    | 13(2)    | 27(2)    | 0(2)     | -7(2)    | 7(2)     |

**Table S5.** The degree of distortion, dipole moment, and hyperpolarizability of the [CdN<sub>3</sub>O<sub>3</sub>] octahedral unit with different N-Cd-O bond angles.

| [CdN <sub>3</sub> O <sub>3</sub> ] Unit | Bond angle(°) | Distortion | Dipole moment (D) | Hyperpolarizability |
|-----------------------------------------|---------------|------------|-------------------|---------------------|
| 1                                       | 169.007       | 0.2174     | 7.5713            | 512.71              |
| 2                                       | 180.000       | 0.0482     | 6.9678            | 667.01              |



**Table S6.** Cd-based UV/DUV NLO Crystal ( $\lambda_{\text{cut-off}} < 300\text{nm}$ ).

| Compound                                                                                           | SHG( $\times$ KDP) | $\lambda_{\text{cut-off}}$ (nm) | Crystal Size(mm <sup>3</sup> ) |
|----------------------------------------------------------------------------------------------------|--------------------|---------------------------------|--------------------------------|
| LiCd(IO <sub>3</sub> ) <sub>3</sub> <sup>1</sup>                                                   | 12                 | 297                             | \                              |
| Cd <sub>2</sub> (IO <sub>3</sub> )(PO <sub>4</sub> ) <sup>2</sup>                                  | 4                  | 243                             | \                              |
| KCdCO <sub>3</sub> F <sup>3</sup>                                                                  | 2.84               | 235                             | \                              |
| RbCdCO <sub>3</sub> F <sup>3</sup>                                                                 | 4.58               | 233                             | \                              |
| Cd <sub>1.62</sub> Mg <sub>0.38</sub> (IO <sub>3</sub> )(PO <sub>4</sub> ) <sup>2</sup>            | 3.5                | 231                             | \                              |
| Cd(NH <sub>2</sub> SO <sub>3</sub> ) <sub>2</sub> ·2H <sub>2</sub> O <sup>4</sup>                  | 0.15               | 210                             | 1.5×1.5×2.7                    |
| K <sub>7</sub> CdGd <sub>2</sub> B <sub>15</sub> O <sub>30</sub> <sup>5</sup>                      | 1.7                | 206                             | \                              |
| K <sub>7</sub> CdSc <sub>2</sub> B <sub>15</sub> O <sub>30</sub> <sup>5</sup>                      | 1.5                | 200                             | \                              |
| K <sub>7</sub> CdY <sub>2</sub> B <sub>15</sub> O <sub>30</sub> <sup>5</sup>                       | 1.6                | 200                             | \                              |
| Cd(NH <sub>4</sub> ) <sub>2</sub> (PO <sub>3</sub> F) <sub>2</sub> ·2H <sub>2</sub> O <sup>6</sup> | 0.78               | <200                            | 0.3 × 5 × 0.1                  |
| CsLiCdP <sub>2</sub> O <sub>7</sub> <sup>7</sup>                                                   | 1.5                | <200                            | 0.11×0.09 ×0.08                |
| K <sub>7</sub> CdLu <sub>2</sub> B <sub>15</sub> O <sub>30</sub> <sup>5</sup>                      | 1.9                | 192                             | \                              |
| RbCdP <sub>3</sub> O <sub>9</sub> <sup>8</sup>                                                     | 0.1                | <190                            | \                              |
| <b>KCd(NH<sub>2</sub>SO<sub>3</sub>)<sub>3</sub>*</b>                                              | <b>1.1</b>         | <b>&lt;190</b>                  | <b>20×17×5</b>                 |

\* This work.

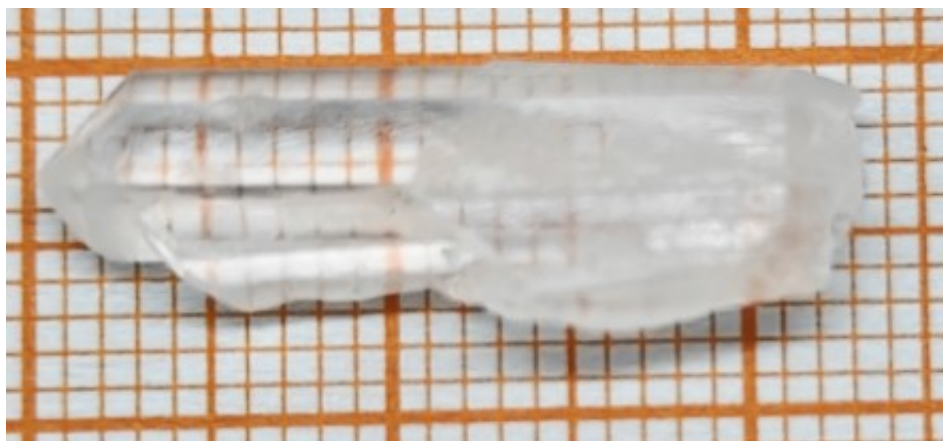

**Figure S1.** Photograph of  $\text{KCd}(\text{NH}_2\text{SO}_3)_3$  crystal.

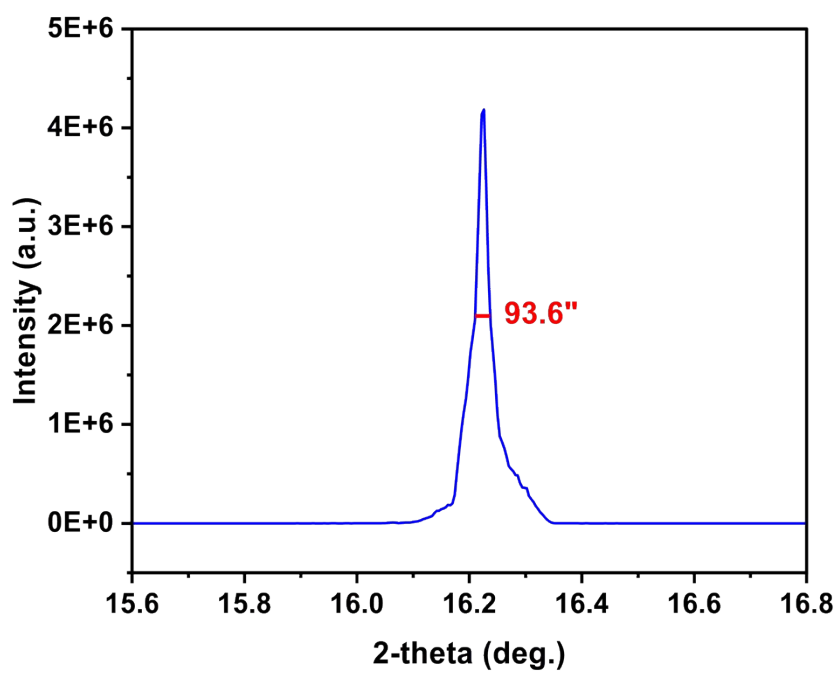

Figure S2. The rocking curve of  $\text{KCd}(\text{NH}_2\text{SO}_3)_3$  single crystal

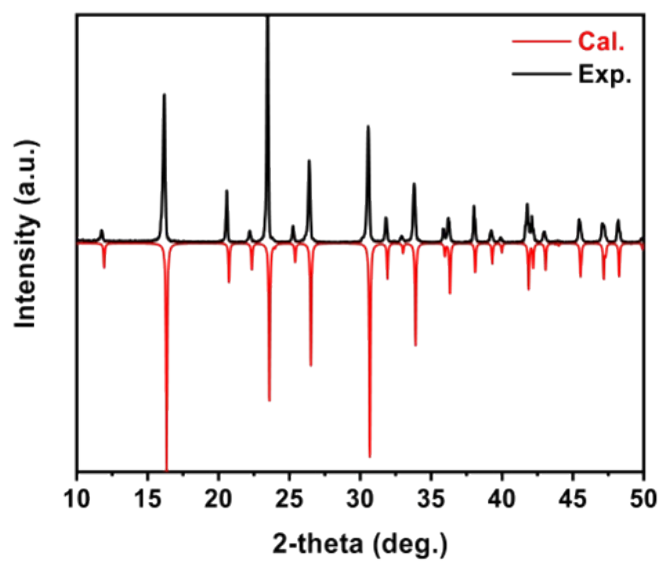

**Figure S3.** Calculated and experimental powder X-ray diffraction patterns of  $\text{KCd}(\text{NH}_2\text{SO}_3)_3$ . No obvious impurity peaks were found, confirming the phase purity.

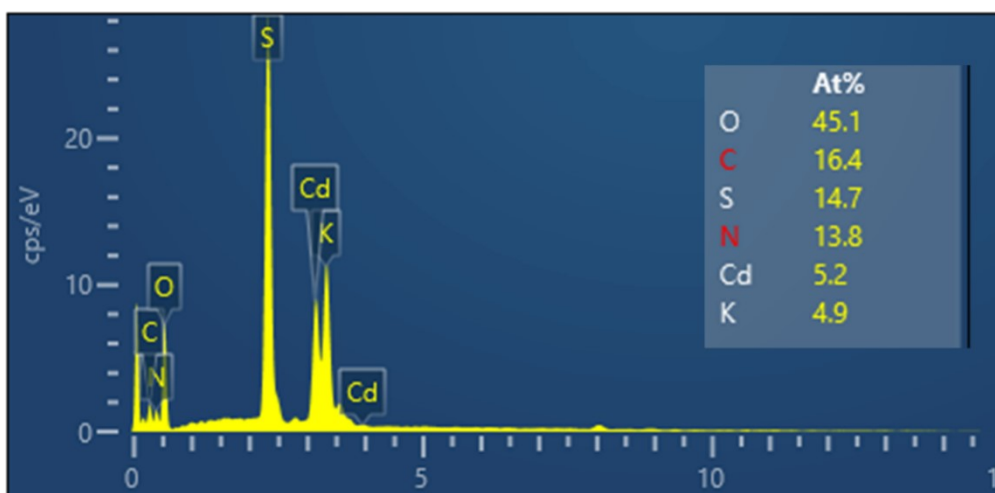

**Figure S4.** Energy dispersive X-ray spectroscopy analysis of  $\text{KCd}(\text{NH}_2\text{SO}_3)_3$ .

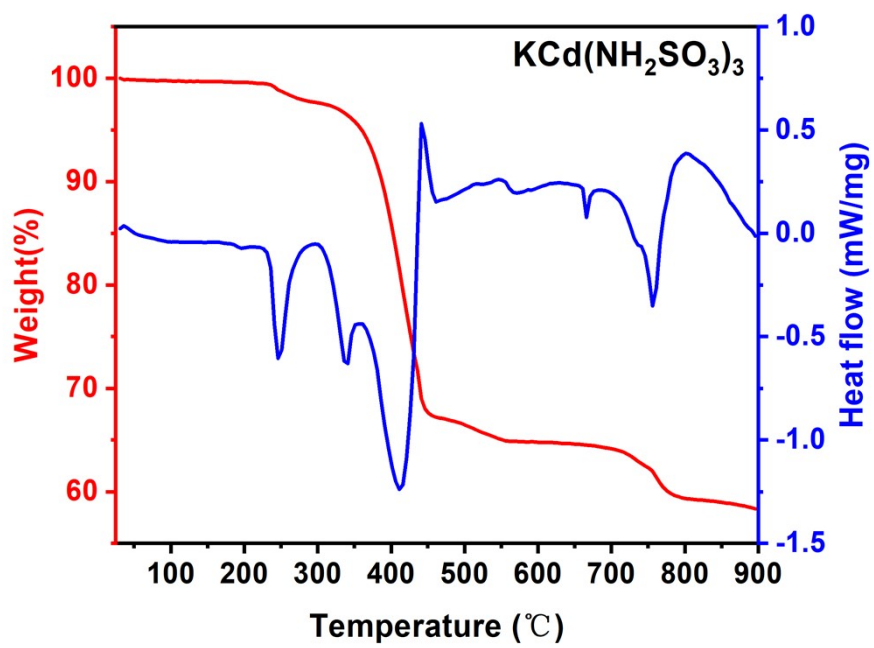

Figure S5. TG-DSC curves of  $\text{KCd}(\text{NH}_2\text{SO}_3)_3$ .

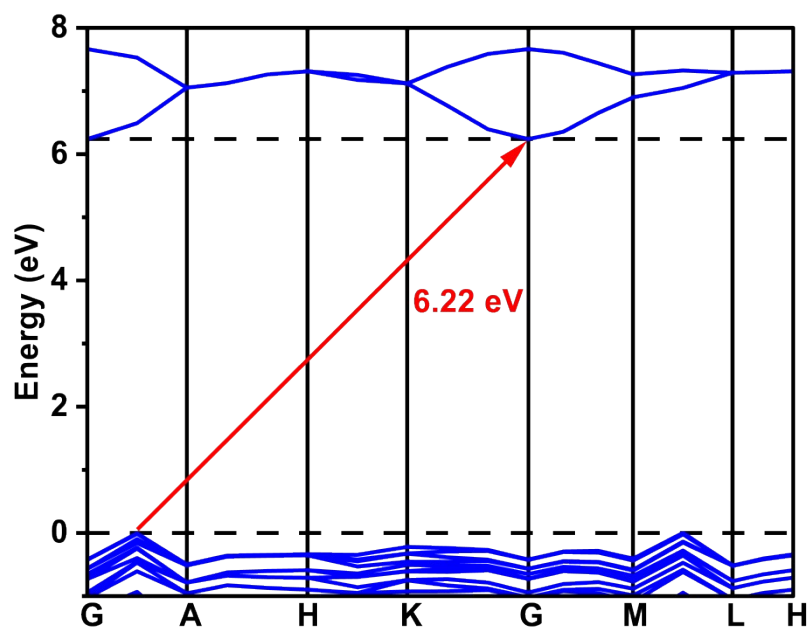

**Figure S6.** The calculated band structure of  $\text{KCd}(\text{NH}_2\text{SO}_3)_3$ .

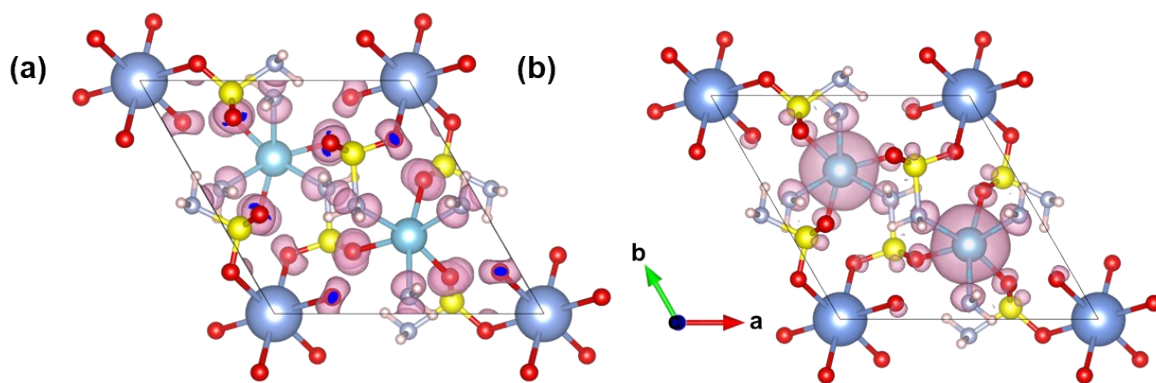

**Figure S7.** The SHG density of  $d_{33}$  in occupied state and unoccupied state for  $\text{KCd}(\text{NH}_2\text{SO}_3)_3$ .



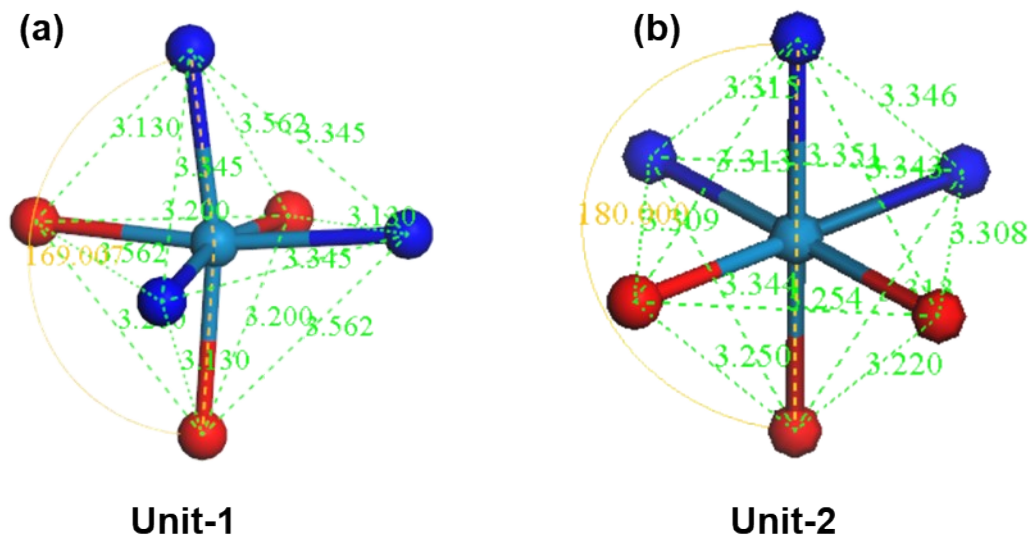

**Figure S8.**  $\text{KCd}(\text{NH}_2\text{SO}_3)_3$  the  $[\text{CdN}_3\text{O}_3]$  octahedral unit with different N-Cd-O bond angles and lengths of the octahedron.

## References

- 1 Y. Jia, Y. Chen, Y. Guo, X. Guan, C. Li, B. Li, M. Liu and X. Zhang,  $\text{LiMII}(\text{IO}_3)_3$  (MII = Zn and Cd): Two Promising Nonlinear Optical Crystals Derived from a Tunable Structure Model of  $\alpha\text{-LiIO}_3$ , *Angew. Chem., Int. Ed.*, 2019, **58**, 17194–17198.
- 2 Q.-Q. Chen, C.-L. Hu, L.-J. Yao, J. Chen, M.-Y. Cao, B.-X. Li and J.-G. Mao,  $\text{Cd}_2(\text{IO}_3)(\text{PO}_4)$  and  $\text{Cd}_{1.62}\text{Mg}_{0.38}(\text{IO}_3)(\text{PO}_4)$ : metal iodate-phosphates with large SHG responses and wide band gaps†, *Chem. Commun.*, 2022, **58**, 7694–7697.
- 3 G. Yang, G. Peng, N. Ye, J. Wang, M. Luo, T. Yan and Y. Zhou, Structural Modulation of Anionic Group Architectures by Cations to Optimize SHG Effects: A Facile Route to New NLO Materials in the  $\text{ATCO}_3\text{F}$  (A = K, Rb; T=Zn, Cd) Series, *Chem. Mater.*, 2015, **27**, 7520–7530.
- 4 X. Wang, J. Lee, Y. Li, Y. Kuk and K. M. Ok,  $\text{Cd}(\text{NH}_2\text{SO}_3)_2 \cdot x\text{H}_2\text{O}$  (x = 0, 2): new sulfamates with unique coordination environment and reversible phase transitions, *Inorg. Chem. Front.*, 2023, **10**, 1411–1420.
- 5 Z. Xie, M. Mutailipu, G. He, G. Han, Y. Wang, Z. Yang, M. Zhang and S. Pan, A Series of Rare-Earth Borates  $\text{K}_7\text{MRE}_2\text{B}_{15}\text{O}_{30}$  (M = Zn, Cd, Pb; RE = Sc, Y, Gd, Lu) with Large Second Harmonic Generation Responses, *Chem. Mater.*, 2018, **30**, 2414–2423.
- 6 X.-R. Yang, X. Liu, X.-B. Deng, L. Chen and L.-M. Wu, Isomeric  $\text{Cd}(\text{NH}_4)_2(\text{PO}_3\text{F})_2 \cdot 2\text{H}_2\text{O}$ : Solution concentration-driven elimination of antiparallel dipole-dipole interaction generating an SHG  $\beta$  phase, *Mater. Today Phys.*, 2023, **31**, 100999.
- 7 Y. Shen, S. Zhao, B. Zhao, C. Ji, L. Li, Z. Sun, M. Hong and J. Luo, Strong Nonlinear-Optical Response in the Pyrophosphate  $\text{CsLiCdP}_2\text{O}_7$  with a Short Cutoff Edge, *Inorg. Chem.*, 2016, **55**, 11626–11629.
- 8 M. Abudourehman, X. Pan, S. Han, Y. Rouzhahong, Z. Yang, H. Wu and S. Pan,  $\text{MIMIIP}_3\text{O}_9$  (MI = Rb, MII = Cd, Mg, Ca; MI = Cs, MIII = Pb, Sr; MI = K, MII = Mg): Cation Substitution Application in Cyclophosphate Family and Nonlinear Optical Properties, *Inorg. Chem.*, 2018, **57**, 7372–7379.
